# Supplementary material
Source: publisher figshare collection journal article supplement (https://gsajournals.figshare.com/ndownloader/files/12725168)
Supplement: Supplementary file 1 [file 12725168]

## Sheet: Table S8-AsmPilonAfterRacon
Table S9: Assembly statistics and BUSCO scores for all genomes after iteratively polishing with Racon followed by Pilon.
					Assembly Statistics						BUSCO Scores
Species	Assembly Name	Racon Runs	Pilon Runs		Assembly Size (bp)	Contigs	N50 (bp)	Contigs >100Kb	Contigs >1Mb		Complete (%)	Complete and Single Copy (%)	Complete and duplicated (%)	Fragmented (%)	Missing (%)	BUSCOs Tested
Dana	Dana.pass.miniasm.racon.x1.pilon.x0.fasta	1	0		189234428	371	2611025	147	44		88.3	87.4	0.9	7	4.7	978
Dana	Dana.pass.miniasm.racon.x1.pilon.x1.fasta	1	1		189330389	371	2613511	147	44		97.4	96.1	1.3	0.3	2.3	978
Dana	Dana.pass.miniasm.racon.x2.pilon.x1.fasta	2	1		189323996	371	2615095	147	44		93.6	93	0.6	3.2	3.2	978
Dana	Dana.pass.miniasm.racon.x2.pilon.x2.fasta	2	2		189303275	371	2613079	147	44		97.9	96.6	1.3	0.3	1.8	978
Dana	Dana.pass.miniasm.racon.x3.pilon.x2.fasta	3	2		189290646	371	2615305	147	44		92.3	91	1.3	4.9	2.8	978
Dana	Dana.pass.miniasm.racon.x3.pilon.x3.fasta	3	3		189254466	371	2613308	147	44		98.1	96.6	1.5	0.3	1.6	978
Dana	Dana.pass.miniasm.racon.x4.pilon.x3.fasta	4	3		189231014	370	2615766	147	44		92.6	91.7	0.9	4.2	3.2	978
Dana	Dana.pass.miniasm.racon.x4.pilon.x4.fasta	4	4		189209840	370	2613583	147	44		97.9	96.5	1.4	0.4	1.7	978
Dbia	Dbia.pass.miniasm.racon.x1.pilon.x0.fasta	1	0		182882016	666	2793476	222	31		88.3	87.5	0.8	7.7	4	978
Dbia	Dbia.pass.miniasm.racon.x1.pilon.x1.fasta	1	1		182615325	666	2791743	221	31		97.9	96.4	1.5	0.5	1.6	978
Dbia	Dbia.pass.miniasm.racon.x2.pilon.x1.fasta	2	1		182800023	661	2794722	222	31		93.3	92.3	1	4	2.7	978
Dbia	Dbia.pass.miniasm.racon.x2.pilon.x2.fasta	2	2		182478599	661	2791456	222	31		98.5	97	1.5	0.3	1.2	978
Dbia	Dbia.pass.miniasm.racon.x3.pilon.x2.fasta	3	2		182699770	661	2794654	222	31		93.9	92.8	1.1	3.6	2.5	978
Dbia	Dbia.pass.miniasm.racon.x3.pilon.x3.fasta	3	3		182407600	661	2791440	221	31		98.5	96.7	1.8	0.3	1.2	978
Dbia	Dbia.pass.miniasm.racon.x4.pilon.x3.fasta	4	3		182628701	661	2794715	221	31		92.9	92	0.9	4.6	2.5	978
Dbia	Dbia.pass.miniasm.racon.x4.pilon.x4.fasta	4	4		182321329	661	2791405	220	31		98.5	96.8	1.7	0.2	1.3	978
Dbip	Dbip.pass.miniasm.racon.x1.pilon.x0.fasta	1	0		163588498	570	566858	356	26		74.9	73.9	1	13.2	11.9	978
Dbip	Dbip.pass.miniasm.racon.x1.pilon.x1.fasta	1	1		163346268	570	567595	356	26		93	91	2	1.5	5.5	978
Dbip	Dbip.pass.miniasm.racon.x2.pilon.x1.fasta	2	1		163771705	570	567575	356	27		83.7	83	0.7	7.6	8.7	978
Dbip	Dbip.pass.miniasm.racon.x2.pilon.x2.fasta	2	2		163302167	570	567194	356	26		93.3	90.9	2.4	1.1	5.6	978
Dbip	Dbip.pass.miniasm.racon.x3.pilon.x2.fasta	3	2		163703253	570	567615	356	27		83.4	82.5	0.9	8.5	8.1	978
Dbip	Dbip.pass.miniasm.racon.x3.pilon.x3.fasta	3	3		163245629	570	567490	356	27		92.9	90.8	2.1	1.3	5.8	978
Dbip	Dbip.pass.miniasm.racon.x4.pilon.x3.fasta	4	3		163640313	570	567582	356	27		83.1	82.3	0.8	8.9	8	978
Dbip	Dbip.pass.miniasm.racon.x4.pilon.x4.fasta	4	4		163184895	570	567216	356	26		93.3	90.4	2.9	0.9	5.8	978
Dere	Dere.pass.miniasm.racon.x1.pilon.x0.fasta	1	0		130266997	58	16973159	29	21		89.9	89.3	0.6	6.2	3.9	978
Dere	Dere.pass.miniasm.racon.x1.pilon.x1.fasta	1	1		130327693	58	16969928	29	21		97.9	96.7	1.2	0.5	1.6	978
Dere	Dere.pass.miniasm.racon.x2.pilon.x1.fasta	2	1		130382825	58	16976291	29	21		93.6	92.9	0.7	3.6	2.8	978
Dere	Dere.pass.miniasm.racon.x2.pilon.x2.fasta	2	2		130300522	58	16954489	29	21		98.4	96.8	1.6	0.1	1.5	978
Dere	Dere.pass.miniasm.racon.x3.pilon.x2.fasta	3	2		130353328	58	16962282	29	21		93.7	93	0.7	3.7	2.6	978
Dere	Dere.pass.miniasm.racon.x3.pilon.x3.fasta	3	3		130293130	58	16944623	29	21		98.4	97	1.4	0.2	1.4	978
Dere	Dere.pass.miniasm.racon.x4.pilon.x3.fasta	4	3		130343876	58	16953165	29	21		93.1	92.2	0.9	4.4	2.5	978
Dere	Dere.pass.miniasm.racon.x4.pilon.x4.fasta	4	4		130267915	58	16944619	29	21		98.3	96.8	1.5	0.4	1.3	978
Deug	Deug.pass.miniasm.racon.x1.pilon.x0.fasta	1	0		159605700	547	1009751	260	43		82.6	82.1	0.5	10.4	7	978
Deug	Deug.pass.miniasm.racon.x1.pilon.x1.fasta	1	1		159641819	547	1010130	260	43		97.3	95.5	1.8	0.7	2	978
Deug	Deug.pass.miniasm.racon.x2.pilon.x1.fasta	2	1		159673708	546	1011669	260	43		89	87.7	1.3	6.3	4.7	978
Deug	Deug.pass.miniasm.racon.x2.pilon.x2.fasta	2	2		159552356	546	1010890	259	43		97.4	95.6	1.8	0.5	2.1	978
Deug	Deug.pass.miniasm.racon.x3.pilon.x2.fasta	3	2		159562964	546	1011844	259	43		90.2	89	1.2	5.4	4.4	978
Deug	Deug.pass.miniasm.racon.x3.pilon.x3.fasta	3	3		159414012	546	1011207	258	43		97.6	95.8	1.8	0.4	2	978
Deug	Deug.pass.miniasm.racon.x4.pilon.x3.fasta	4	3		159424897	546	1011839	258	43		89.4	88.1	1.3	6.2	4.4	978
Deug	Deug.pass.miniasm.racon.x4.pilon.x4.fasta	4	4		159327702	546	1011038	258	43		97.1	95.2	1.9	0.6	2.3	978
Dtriauraria	Dtriauraria.pass.miniasm.racon.x1.pilon.x0.fasta	1	0		173380011	482	741165	342	35		82.9	81.6	1.3	7.9	9.2	978
Dtriauraria	Dtriauraria.pass.miniasm.racon.x1.pilon.x1.fasta	1	1		173898069	482	743222	342	35		93.7	89.4	4.3	0.8	5.5	978
Dtriauraria	Dtriauraria.pass.miniasm.racon.x2.pilon.x1.fasta	2	1		173637861	482	742620	342	35		88.5	87	1.5	4.7	6.8	978
Dtriauraria	Dtriauraria.pass.miniasm.racon.x2.pilon.x2.fasta	2	2		173885262	482	743077	342	35		94.1	88.7	5.4	0.6	5.3	978
Dtriauraria	Dtriauraria.pass.miniasm.racon.x3.pilon.x2.fasta	3	2		173612162	482	742448	342	35		88.5	86	2.5	4.9	6.6	978
Dtriauraria	Dtriauraria.pass.miniasm.racon.x3.pilon.x3.fasta	3	3		173860896	482	742425	342	35		94.3	88.7	5.6	0.4	5.3	978
Dtriauraria	Dtriauraria.pass.miniasm.racon.x4.pilon.x3.fasta	4	3		173579319	482	742245	342	35		88.4	85.8	2.6	4.7	6.9	978
Dtriauraria	Dtriauraria.pass.miniasm.racon.x4.pilon.x4.fasta	4	4		173841527	482	743183	342	35		93.8	88.5	5.3	0.6	5.6	978
Dmau	Dmau.pass.miniasm.racon.x1.pilon.x0.fasta	1	0		133964127	272	4727420	65	28		91	90.3	0.7	5.7	3.3	978
Dmau	Dmau.pass.miniasm.racon.x1.pilon.x1.fasta	1	1		134258984	272	4736016	65	28		98	96.3	1.7	0.5	1.5	978
Dmau	Dmau.pass.miniasm.racon.x2.pilon.x1.fasta	2	1		134036541	270	4727965	65	28		95.3	93.9	1.4	2.5	2.2	978
Dmau	Dmau.pass.miniasm.racon.x2.pilon.x2.fasta	2	2		134213196	270	4735855	65	28		98.7	97	1.7	0.1	1.2	978
Dmau	Dmau.pass.miniasm.racon.x3.pilon.x2.fasta	3	2		133978113	268	4728011	65	28		94.9	93.9	1	2.8	2.3	978
Dmau	Dmau.pass.miniasm.racon.x3.pilon.x3.fasta	3	3		134165153	268	4735548	65	28		98.6	96.9	1.7	0.1	1.3	978
Dmau	Dmau.pass.miniasm.racon.x4.pilon.x3.fasta	4	3		133941609	268	4728192	65	28		95.4	94.4	1	2.1	2.5	978
Dmau	Dmau.pass.miniasm.racon.x4.pilon.x4.fasta	4	4		134121293	268	4735637	65	28		98.6	96.9	1.7	0.1	1.3	978
Dmoj	Dmoj.pass.miniasm.racon.x1.pilon.x0.fasta	1	0		167961763	122	5216854	89	40		82.5	81	1.5	9.8	7.7	978
Dmoj	Dmoj.pass.miniasm.racon.x1.pilon.x1.fasta	1	1		168092324	122	5223969	89	40		97.2	94.8	2.4	0.8	2	978
Dmoj	Dmoj.pass.miniasm.racon.x2.pilon.x1.fasta	2	1		168172077	122	5224548	89	40		91.4	90.3	1.1	3.7	4.9	978
Dmoj	Dmoj.pass.miniasm.racon.x2.pilon.x2.fasta	2	2		168083016	122	5221576	88	40		98	95.5	2.5	0.1	1.9	978
Dmoj	Dmoj.pass.miniasm.racon.x3.pilon.x2.fasta	3	2		168135422	122	5221717	88	40		92.3	90.9	1.4	3.5	4.2	978
Dmoj	Dmoj.pass.miniasm.racon.x3.pilon.x3.fasta	3	3		168094910	122	5221700	88	40		97.9	95.4	2.5	0.2	1.9	978
Dmoj	Dmoj.pass.miniasm.racon.x4.pilon.x3.fasta	4	3		168138611	122	5221702	88	40		92.4	90.9	1.5	3.5	4.1	978
Dmoj	Dmoj.pass.miniasm.racon.x4.pilon.x4.fasta	4	4		168084195	122	5221530	87	40		97.8	95.2	2.6	0.3	1.9	978
Dper	Dper.pass.miniasm.racon.x1.pilon.x0.fasta	1	0		164506016	415	3435302	145	34		80.3	79.4	0.9	10.8	8.9	978
Dper	Dper.pass.miniasm.racon.x1.pilon.x1.fasta	1	1		164101787	415	3428846	143	34		97.1	95.2	1.9	0.9	2	978
Dper	Dper.pass.miniasm.racon.x2.pilon.x1.fasta	2	1		164375924	415	3435815	144	34		88.9	87.2	1.7	5.4	5.7	978
Dper	Dper.pass.miniasm.racon.x2.pilon.x2.fasta	2	2		163987919	415	3428525	143	34		97.4	94.4	3	0.5	2.1	978
Dper	Dper.pass.miniasm.racon.x3.pilon.x2.fasta	3	2		164259565	415	3435693	143	34		87.2	85.4	1.8	6.5	6.3	978
Dper	Dper.pass.miniasm.racon.x3.pilon.x3.fasta	3	3		163916300	415	3428699	143	34		97.6	94.5	3.1	0.2	2.2	978
Dper	Dper.pass.miniasm.racon.x4.pilon.x3.fasta	4	3		164196801	415	3435746	143	34		89.7	88.3	1.4	5	5.3	978
Dper	Dper.pass.miniasm.racon.x4.pilon.x4.fasta	4	4		163852484	415	3428354	143	34		97.9	94.7	3.2	0.2	1.9	978
Dpse	Dpse.pass.miniasm.racon.x1.pilon.x0.fasta	1	0		159382384	361	2986395	142	33		84.1	82.8	1.3	8.8	7.1	978
Dpse	Dpse.pass.miniasm.racon.x1.pilon.x1.fasta	1	1		159147619	361	2983252	141	33		97.1	95.5	1.6	0.6	2.3	978
Dpse	Dpse.pass.miniasm.racon.x2.pilon.x1.fasta	2	1		159331083	361	2988324	142	33		89.9	88.9	1	5.8	4.3	978
Dpse	Dpse.pass.miniasm.racon.x2.pilon.x2.fasta	2	2		159045776	361	2983366	141	33		97.8	95.9	1.9	0.2	2	978
Dpse	Dpse.pass.miniasm.racon.x3.pilon.x2.fasta	3	2		159249675	361	2988495	142	33		90.3	88.8	1.5	5.3	4.4	978
Dpse	Dpse.pass.miniasm.racon.x3.pilon.x3.fasta	3	3		158991170	361	2983484	141	33		97.6	95.5	2.1	0.2	2.2	978
Dpse	Dpse.pass.miniasm.racon.x4.pilon.x3.fasta	4	3		159204509	361	2988527	142	33		89.8	88.2	1.6	5.4	4.8	978
Dpse	Dpse.pass.miniasm.racon.x4.pilon.x4.fasta	4	4		158951395	361	2983480	141	33		97.4	95.3	2.1	0.5	2.1	978
Dsec	Dsec.pass.miniasm.racon.x1.pilon.x0.fasta	1	0		137738422	109	7677148	59	23		91.3	90.2	1.1	4.9	3.8	978
Dsec	Dsec.pass.miniasm.racon.x1.pilon.x1.fasta	1	1		138169896	109	7713957	59	23		98.6	97	1.6	0.3	1.1	978
Dsec	Dsec.pass.miniasm.racon.x2.pilon.x1.fasta	2	1		137902989	109	7690421	59	23		94.6	93.5	1.1	3.6	1.8	978
Dsec	Dsec.pass.miniasm.racon.x2.pilon.x2.fasta	2	2		138157234	109	7712778	59	23		98.5	96.7	1.8	0.4	1.1	978
Dsec	Dsec.pass.miniasm.racon.x3.pilon.x2.fasta	3	2		137891737	109	7690816	59	23		94.6	93.4	1.2	3.2	2.2	978
Dsec	Dsec.pass.miniasm.racon.x3.pilon.x3.fasta	3	3		138112540	109	7713352	59	23		98.5	96.7	1.8	0.4	1.1	978
Dsec	Dsec.pass.miniasm.racon.x4.pilon.x3.fasta	4	3		137841053	109	7690750	59	23		94.3	93.5	0.8	3.6	2.1	978
Dsec	Dsec.pass.miniasm.racon.x4.pilon.x4.fasta	4	4		138081992	109	7713017	59	23		98.7	96.8	1.9	0.2	1.1	978
Dsim	Dsim.pass.miniasm.racon.x1.pilon.x0.fasta	1	0		133602479	76	7750648	61	24		91.3	90	1.3	5.2	3.5	978
Dsim	Dsim.pass.miniasm.racon.x1.pilon.x1.fasta	1	1		133762367	76	7765996	61	24		98.4	96.4	2	0.1	1.5	978
Dsim	Dsim.pass.miniasm.racon.x2.pilon.x1.fasta	2	1		133659181	76	7756047	61	24		95.4	94.2	1.2	2.4	2.2	978
Dsim	Dsim.pass.miniasm.racon.x2.pilon.x2.fasta	2	2		133737508	76	7765331	61	24		98.4	96.4	2	0.1	1.5	978
Dsim	Dsim.pass.miniasm.racon.x3.pilon.x2.fasta	3	2		133634189	76	7755919	61	24		95.3	94.2	1.1	2.2	2.5	978
Dsim	Dsim.pass.miniasm.racon.x3.pilon.x3.fasta	3	3		133716193	76	7764289	61	24		98.4	96.4	2	0.1	1.5	978
Dsim	Dsim.pass.miniasm.racon.x4.pilon.x3.fasta	4	3		133604541	76	7755035	61	24		95.8	94.6	1.2	2	2.2	978
Dsim	Dsim.pass.miniasm.racon.x4.pilon.x4.fasta	4	4		133681913	76	7901469	61	24		98.4	96.5	1.9	0.1	1.5	978
Dvir	Dvir.pass.miniasm.racon.x1.pilon.x0.fasta	1	0		169341059	141	4156756	83	40		84.9	84.2	0.7	8.6	6.5	978
Dvir	Dvir.pass.miniasm.racon.x1.pilon.x1.fasta	1	1		169773231	141	4170953	83	40		97.1	95.1	2	0.5	2.4	978
Dvir	Dvir.pass.miniasm.racon.x2.pilon.x1.fasta	2	1		169546713	141	4163842	83	40		90.6	89.6	1	5.2	4.2	978
Dvir	Dvir.pass.miniasm.racon.x2.pilon.x2.fasta	2	2		169758884	141	4171372	83	40		97.4	95.4	2	0.4	2.2	978
Dvir	Dvir.pass.miniasm.racon.x3.pilon.x2.fasta	3	2		169516024	141	4163967	83	40		91.5	90.3	1.2	4.2	4.3	978
Dvir	Dvir.pass.miniasm.racon.x3.pilon.x3.fasta	3	3		169752477	141	4171555	83	40		97.4	95.5	1.9	0.5	2.1	978
Dvir	Dvir.pass.miniasm.racon.x4.pilon.x3.fasta	4	3		169501632	141	4163710	83	40		92.2	91	1.2	4.2	3.6	978
Dvir	Dvir.pass.miniasm.racon.x4.pilon.x4.fasta	4	4		169712859	141	4171375	83	40		97.1	95.1	2	0.6	2.3	978
Dwil	Dwil.pass.miniasm.racon.x1.pilon.x0.fasta	1	0		196059495	490	1524869	268	49		79.7	78.4	1.3	13.5	6.8	978
Dwil	Dwil.pass.miniasm.racon.x1.pilon.x1.fasta	1	1		195211430	490	1519989	267	49		96.4	93.8	2.6	1.7	1.9	978
Dwil	Dwil.pass.miniasm.racon.x2.pilon.x1.fasta	2	1		196064201	489	1525380	268	49		87.3	85.8	1.5	8.2	4.5	978
Dwil	Dwil.pass.miniasm.racon.x2.pilon.x2.fasta	2	2		195035062	489	1519817	267	49		97.4	94.5	2.9	0.8	1.8	978
Dwil	Dwil.pass.miniasm.racon.x3.pilon.x2.fasta	3	2		195911990	489	1525396	268	49		86.8	85.5	1.3	8.3	4.9	978
Dwil	Dwil.pass.miniasm.racon.x3.pilon.x3.fasta	3	3		194995735	489	1518674	267	49		97.4	94.6	2.8	0.8	1.8	978
Dwil	Dwil.pass.miniasm.racon.x4.pilon.x3.fasta	4	3		195865612	489	1524314	268	49		86.7	85.5	1.2	8.5	4.8	978
Dwil	Dwil.pass.miniasm.racon.x4.pilon.x4.fasta	4	4		194906010	489	1520196	267	49		97.9	95.2	2.7	0.4	1.7	978
Dyak	Dyak.pass.miniasm.racon.x1.pilon.x0.fasta	1	0		143021842	111	5218344	68	34		86.7	86.2	0.5	8.6	4.7	978
Dyak	Dyak.pass.miniasm.racon.x1.pilon.x1.fasta	1	1		143313311	111	5228746	68	34		98.2	96.8	1.4	0.4	1.4	978
Dyak	Dyak.pass.miniasm.racon.x2.pilon.x1.fasta	2	1		143165987	111	5223480	68	34		92.9	92.2	0.7	4.3	2.8	978
Dyak	Dyak.pass.miniasm.racon.x2.pilon.x2.fasta	2	2		143298880	111	5227729	68	34		98.3	96.7	1.6	0.2	1.5	978
Dyak	Dyak.pass.miniasm.racon.x3.pilon.x2.fasta	3	2		143156621	111	5222799	68	34		92.9	92	0.9	4.1	3	978
Dyak	Dyak.pass.miniasm.racon.x3.pilon.x3.fasta	3	3		143281828	111	5227189	68	34		98.3	96.9	1.4	0.2	1.5	978
Dyak	Dyak.pass.miniasm.racon.x4.pilon.x3.fasta	4	3		143131190	111	5222974	68	34		92.6	91.7	0.9	4.4	3	978
Dyak	Dyak.pass.miniasm.racon.x4.pilon.x4.fasta	4	4		143269464	111	5228061	68	34		98.2	96.6	1.6	0.3	1.5	978
